# Supplementary material for: SNA077, an Extract of Marine Streptomyces sp., Inhibits Melanogenesis by Downregulating Melanogenic Proteins via Inactivation of cAMP/PKA/CREB Signaling
Source: MDPI journal article supplement (doi:10.3390/ijms232314922), 2022-11-29

## Supplementary Figures

**Figure S1.** UV spectra of prodigiosin in SNA077 fraction (blue) in comparison with in-house known compound (red).  
(A) prodigiosin, match score = 998.

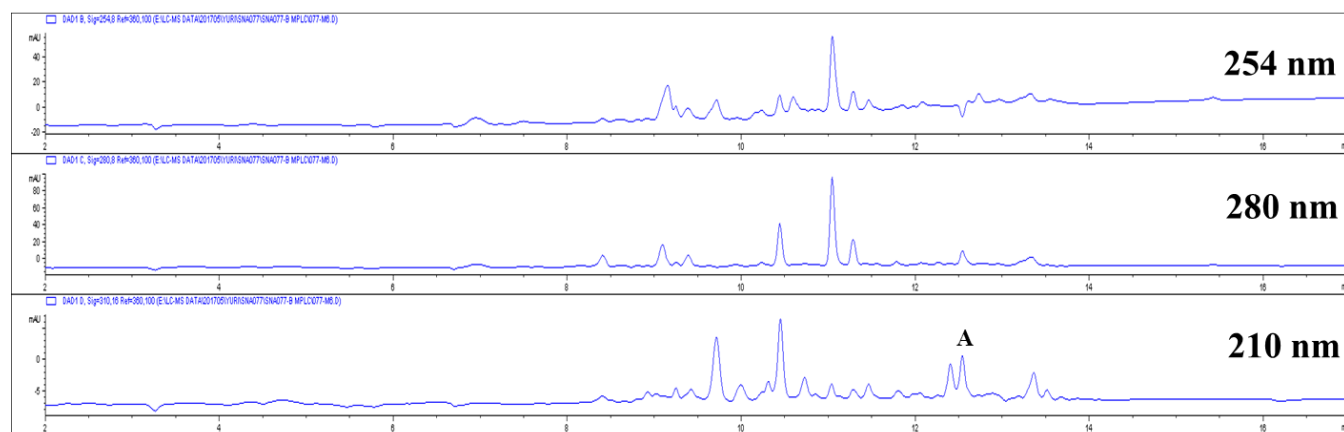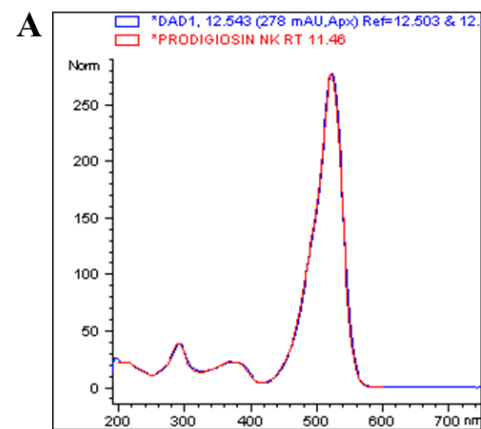

**Figure S2. LRMS Data of germicidin A**

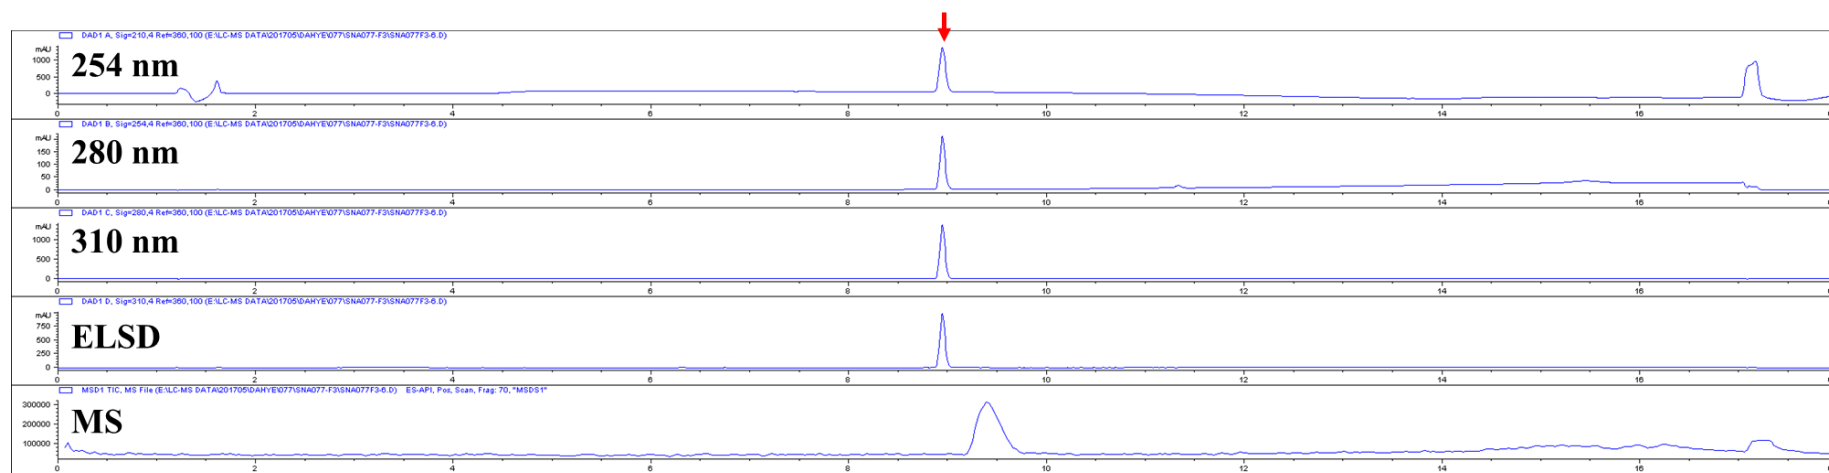

**UV**

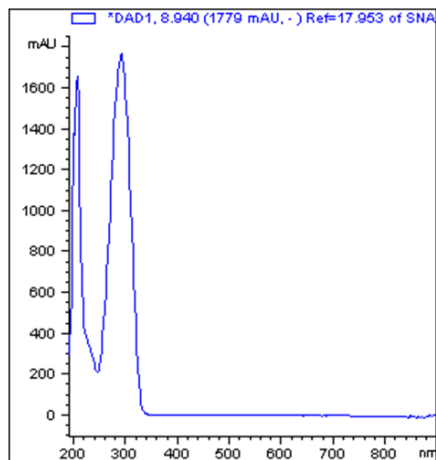

**MS**

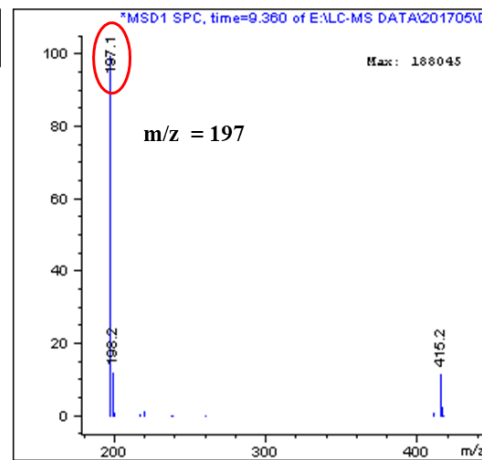

**Figure S3.**  $^1\text{H}$  NMR Spectrum of germicidin A in  $\text{CD}_3\text{OD}$

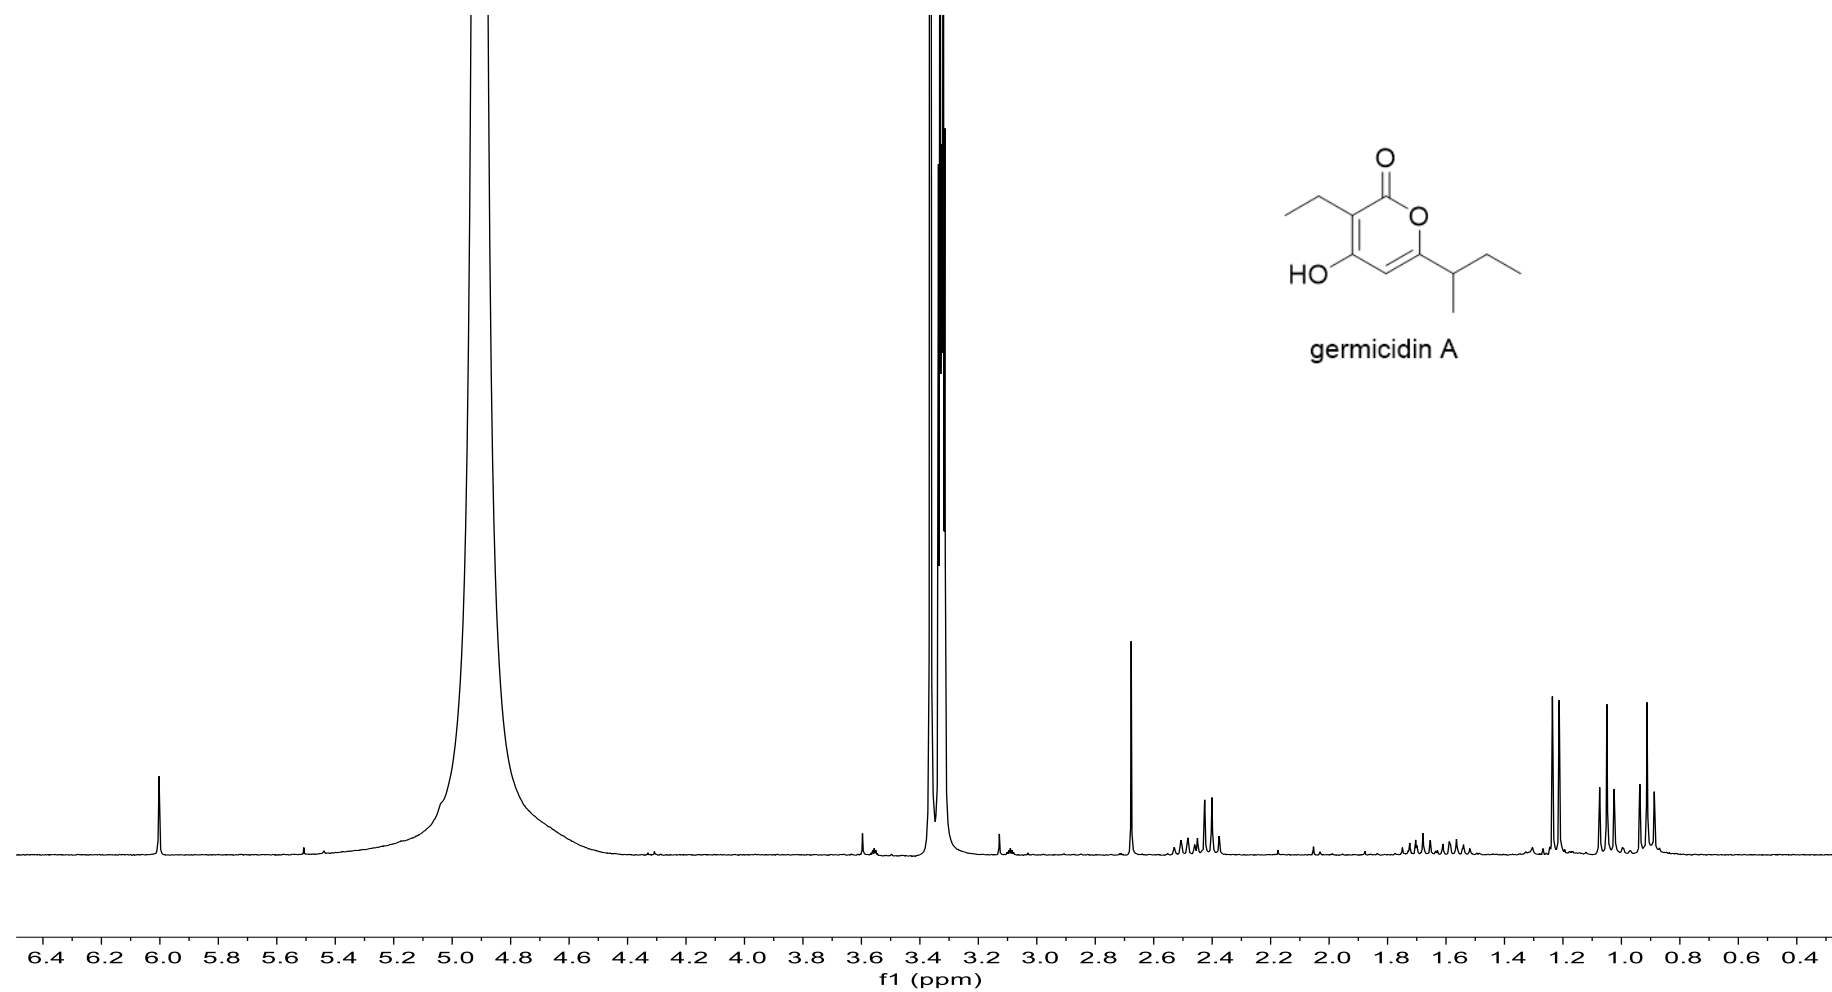

**Figure S4.**  $^{13}\text{C}$  NMR Spectrum of germicidin A in  $\text{CD}_3\text{OD}$

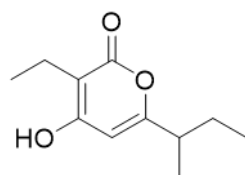

germicidin A

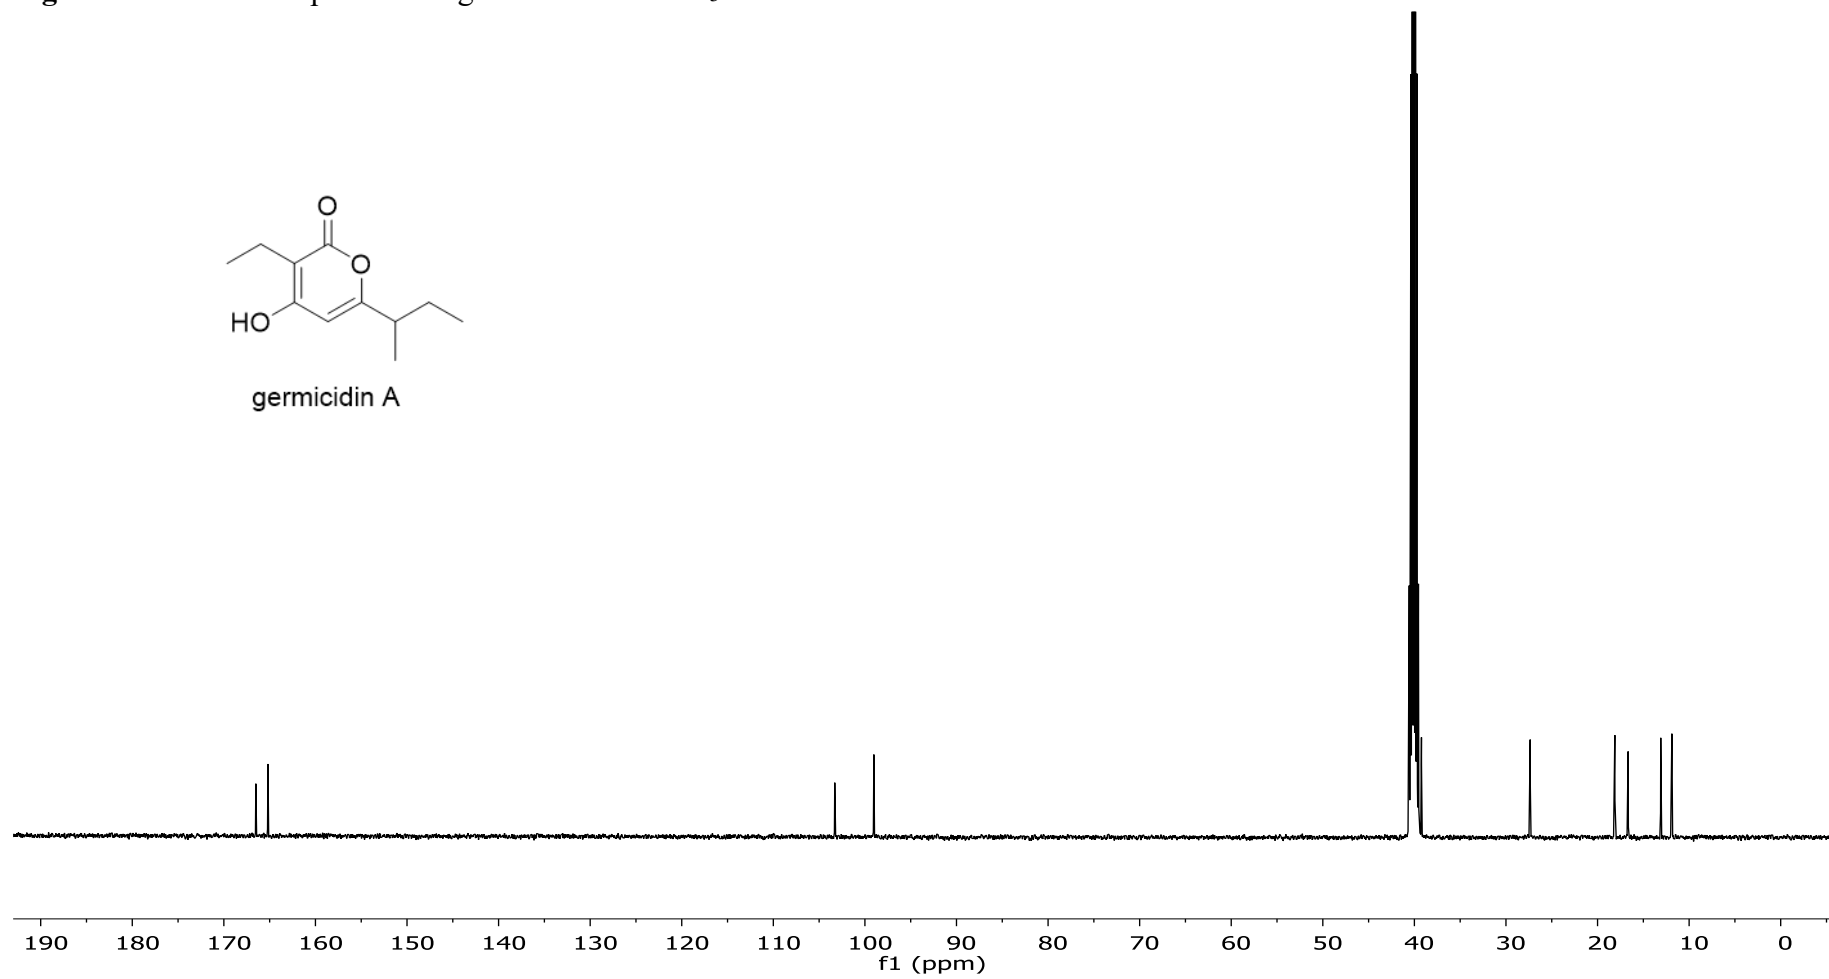

Figure S5. LRMS Data of Isogermicidin A

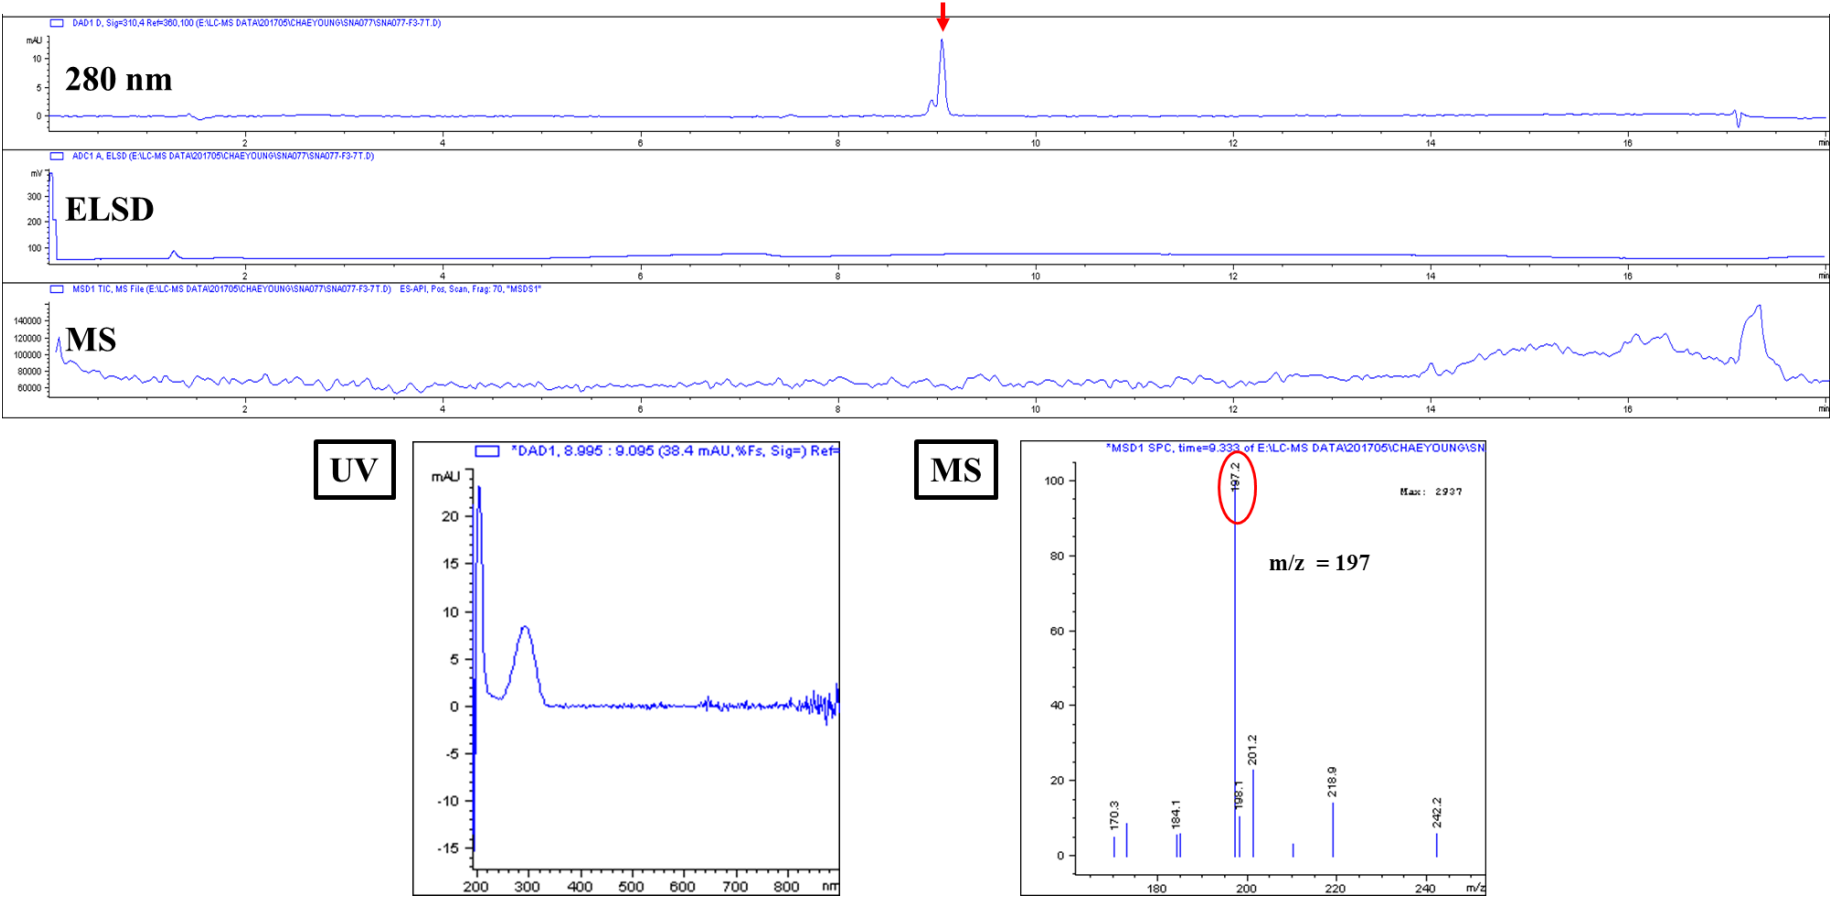

**Figure S6.**  $^1\text{H}$  NMR Spectrum of Isogermicidin A in  $\text{CD}_3\text{OD}$

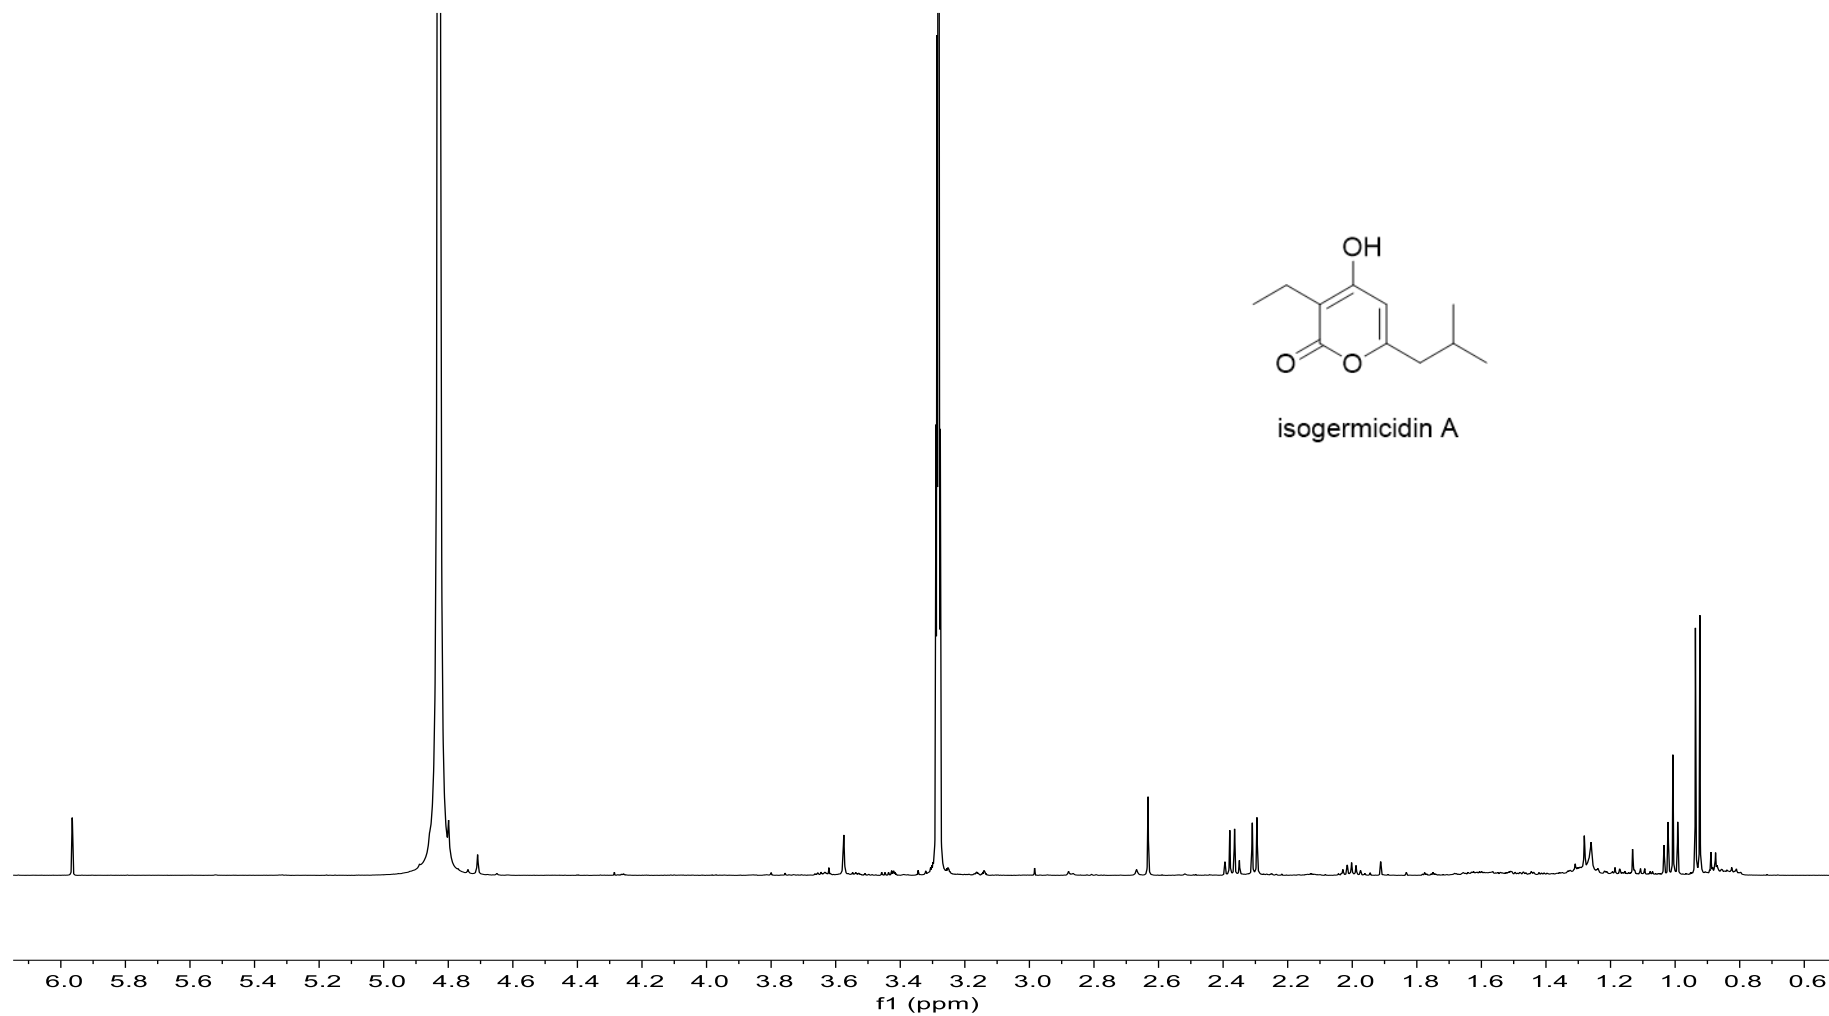

**Figure S7.**  $^{13}\text{C}$  NMR Spectrum of Isogermicidin A in  $\text{CD}_3\text{OD}$

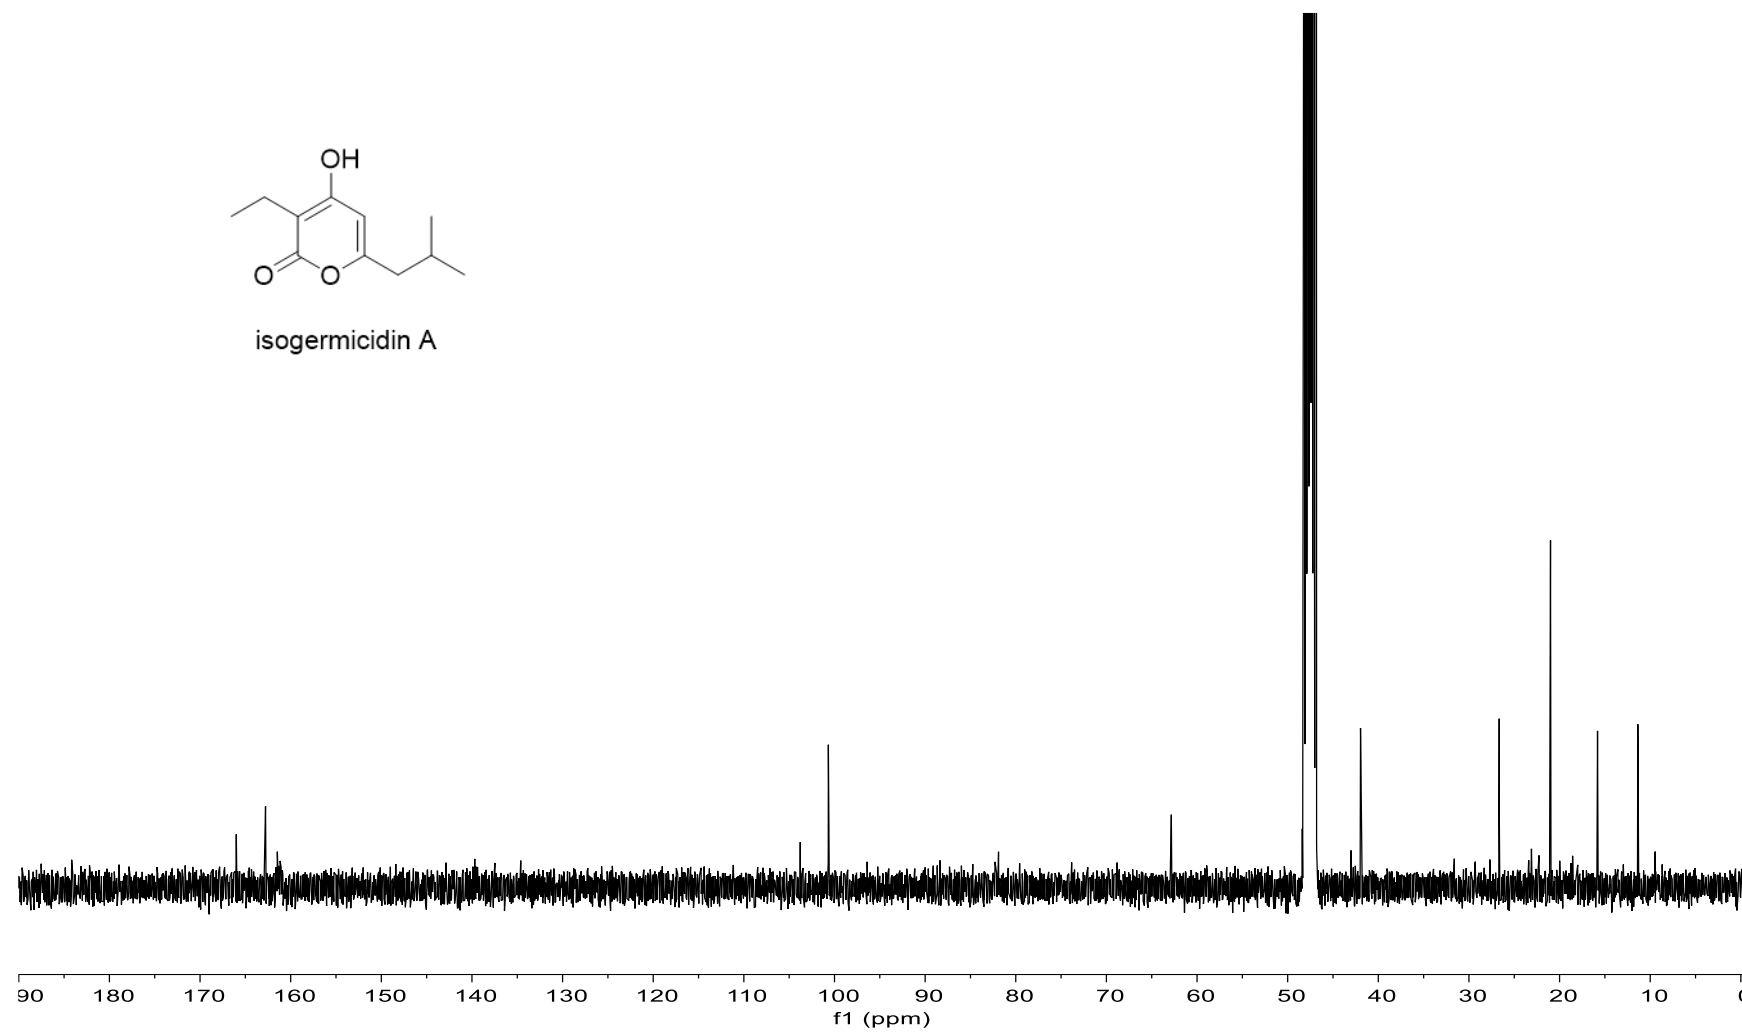

**Figure S8.** LRMS Data of Prodigiosin

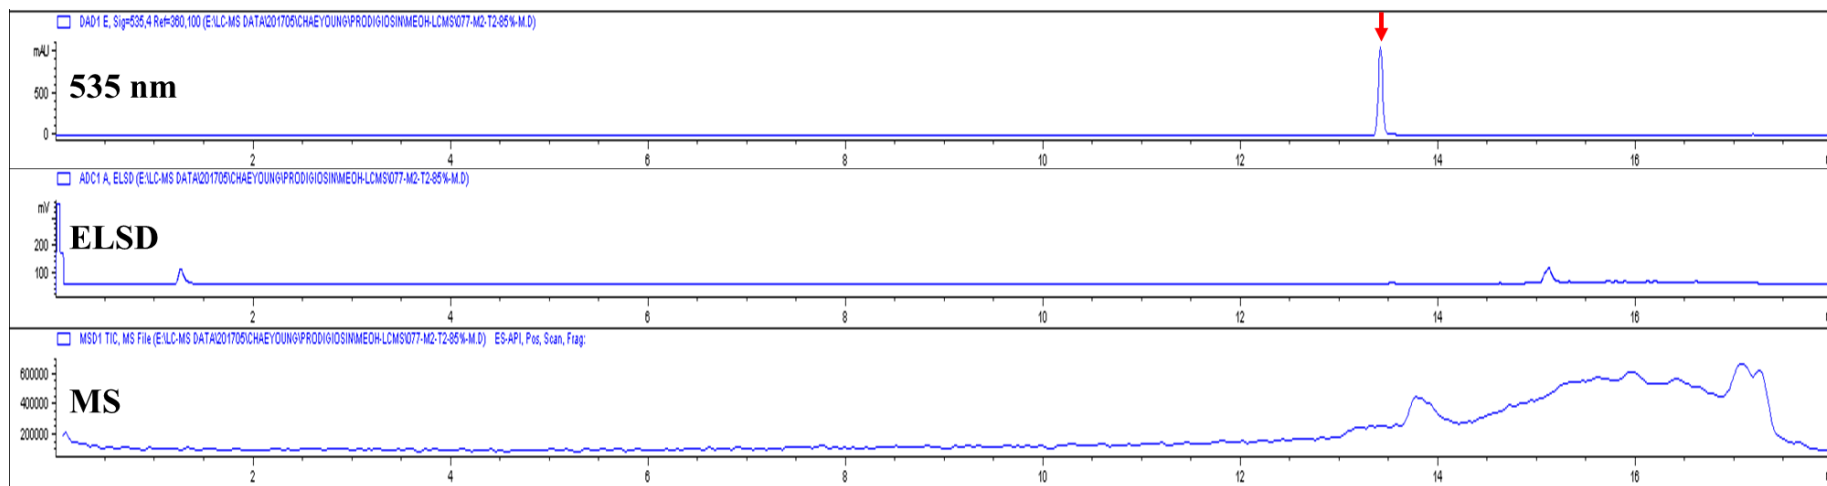

**UV**

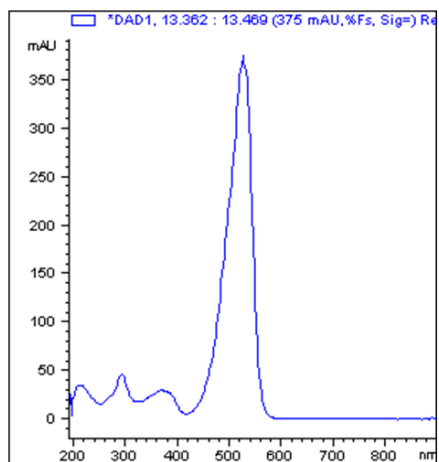

**MS**

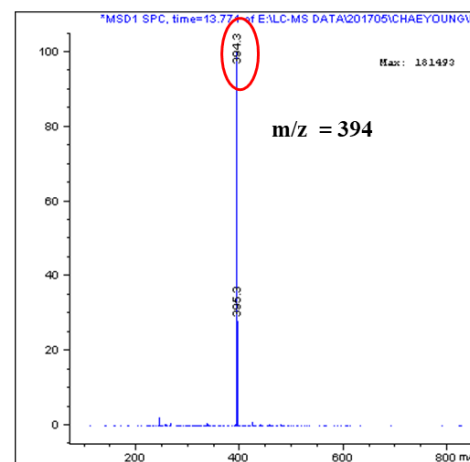



**Figure S9.**  $^1\text{H}$  NMR Spectrum of Prodigiosin in  $\text{CDCl}_3$

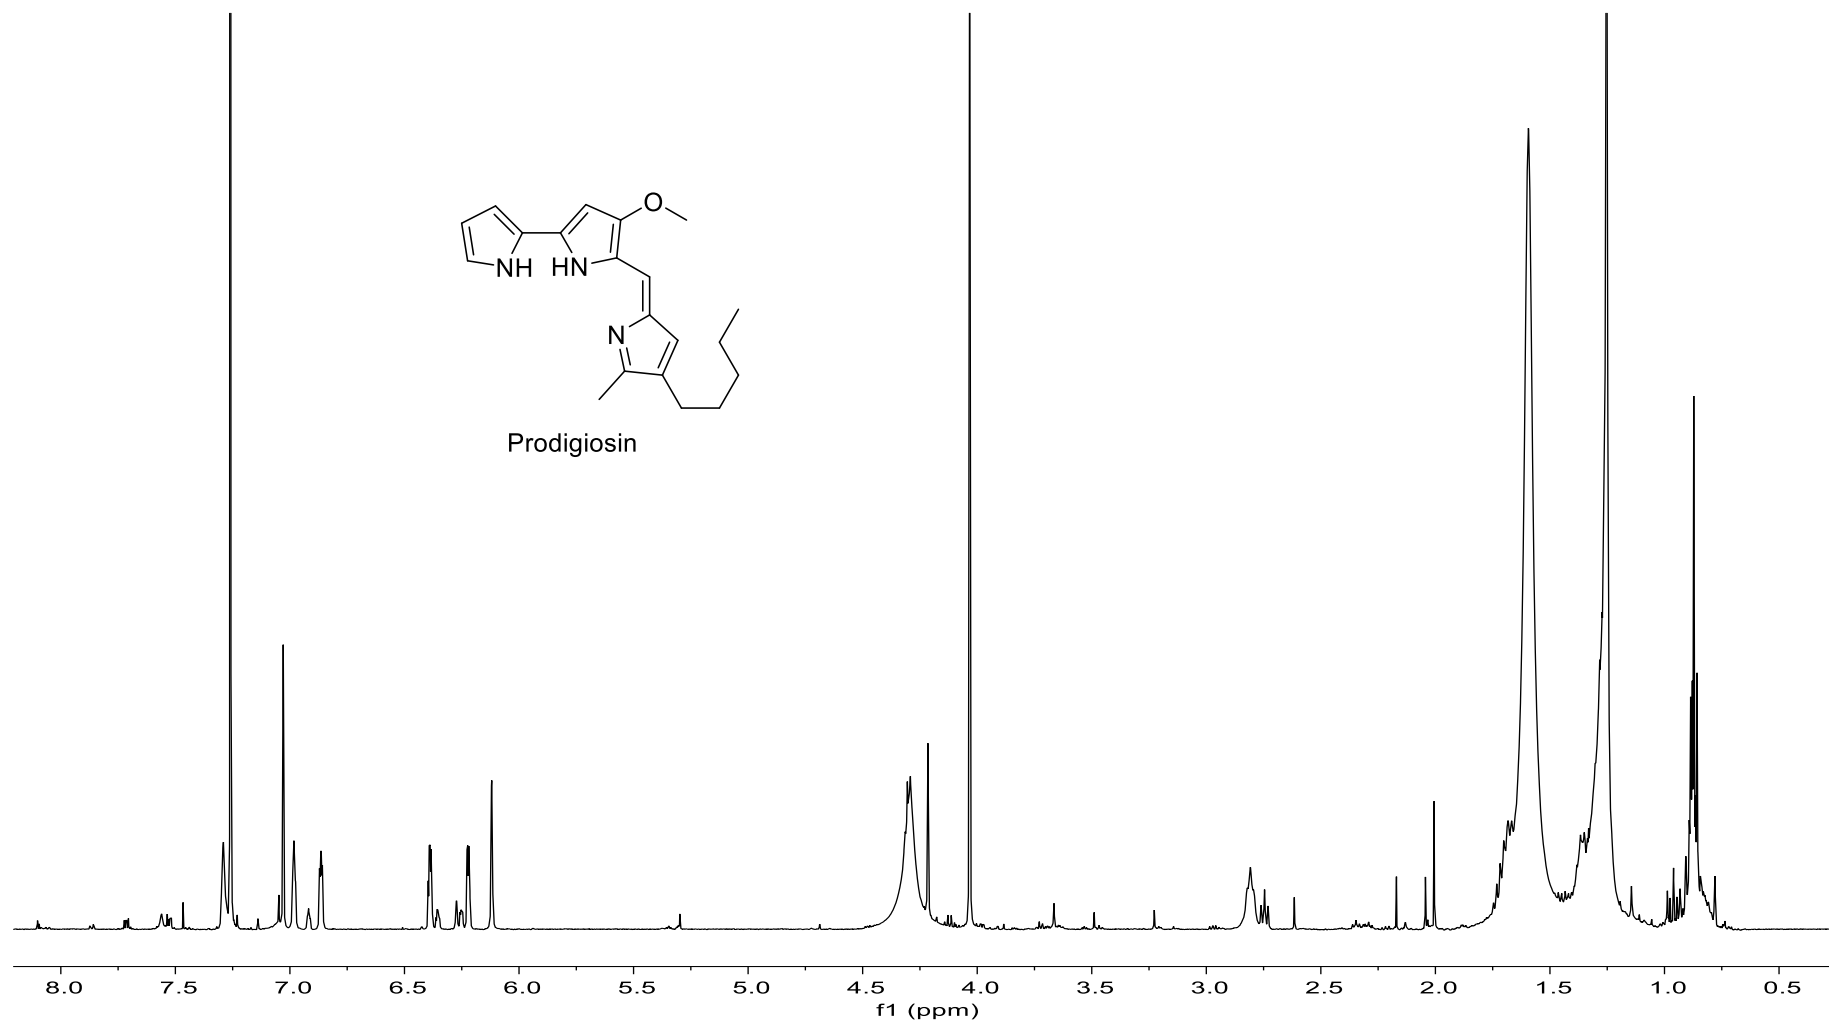

Supplement: s1 [file s1]
